# Supplementary material for: Rank-based genome-wide analysis reveals the association of Ryanodine receptor-2 gene variants with childhood asthma among human populations
Source: PubMed Central journal article supplement (PMC3708719; doi:10.1186/1479-7364-7-16), 2013-07-05
Supplement: 1479-7364-7-16-S1.pdf [file 1479-7364-7-16-S1.pdf]

## **Supplemental Data**

### **Rank based genome wide analysis reveals association of ryanodine receptor-2 gene variants with childhood asthma among human populations**

Lili Ding, Tilahun Abebe, Joseph Beyene, Russell A. Wilke, Arnon Goldberg, Jessica G. Woo, Lisa J. Martin, Marc E. Rothenberg, Marepalli Rao, Gurjit K. Khurana Hershey, Ranajit Chakraborty, Tesfaye B. Mersha

**Table S1: Top 100 SNPs of European American population.**

**Table S2: Top 100 SNPs of African-American population.**

**Table S3: Top 100 SNPs of Hispanic population.**

**Table S4: Top 100 SNPs of trans-ancestral mega-analysis.**

**Table S5: Number of SNPs with p-value below cutoffs.**

**Table S6: top 1% SNPs of RYR2 after imputation for each population.**

**Table S7: Top 30 pathways of each population when top 1,000 SNPs are declared as noteworthy.**

**Table S8: Top 30 GO terms of each population when top 1K SNPs are declared as noteworthy.**

**Table S1: Top 100 SNPs of European American population.** SNPs are ordered by p-values in the European American population (P1). When available, their p-values in African Americans (P2), Hispanic Americans (P3), and the mega-analysis (P123) are provided. P-values in bold are < 0.05.

| rsID       | Gene           | Chr | BP        | P1       | P2              | P3              | P123            |
|------------|----------------|-----|-----------|----------|-----------------|-----------------|-----------------|
| rs16929097 |                | 9   | 12521826  | 1.81E-07 | <b>1.14E-02</b> | 4.14E-01        | <b>8.33E-09</b> |
| rs17036023 | <i>IGSF3</i>   | 1   | 117129711 | 2.04E-07 | 6.95E-01        | <b>1.43E-02</b> | <b>5.20E-06</b> |
| rs8091379  |                | 18  | 52491880  | 2.04E-07 | 2.21E-01        | 3.17E-01        | <b>1.93E-03</b> |
| rs16835325 | <i>RYR2</i>    | 1   | 237659306 | 2.55E-07 | 1.17E-01        | 7.63E-01        | <b>6.58E-03</b> |
| rs12570188 | <i>HPSE2</i>   | 10  | 100855702 | 3.19E-07 | 8.33E-02        | 1.57E-01        | <b>4.60E-08</b> |
| rs16974314 | <i>UNC13C</i>  | 15  | 54508722  | 3.41E-07 | 5.27E-01        | 8.33E-02        | <b>1.54E-05</b> |
| rs1843978  |                | 8   | 89925447  | 3.46E-07 | NA              | 2.57E-01        | NA              |
| rs11000019 | <i>PSAP</i>    | 10  | 73591530  | 4.46E-07 | 3.17E-01        | 8.33E-02        | <b>7.62E-08</b> |
| rs6054973  |                | 20  | 7385958   | 5.34E-07 | 1.66E-01        | <b>4.55E-02</b> | <b>1.11E-07</b> |
| rs11217942 | <i>GRIK4</i>   | 11  | 120533008 | 5.36E-07 | NA              | 8.33E-02        | NA              |
| rs13435403 |                | 4   | 115235779 | 5.73E-07 | 8.66E-01        | 5.88E-02        | <b>1.18E-04</b> |
| rs12353399 | <i>C9ORF68</i> | 9   | 4635448   | 5.73E-07 | NA              | 1.80E-01        | NA              |
| rs431470   |                | 3   | 11945930  | 5.93E-07 | NA              | 1.00E+00        | NA              |
| rs6836368  |                | 4   | 130751286 | 6.52E-07 | 7.89E-01        | 1.17E-01        | <b>4.02E-05</b> |
| rs17479    |                | 5   | 5542927   | 6.91E-07 | NA              | 7.15E-01        | NA              |
| rs2705520  | <i>ATG3</i>    | 3   | 112269287 | 8.95E-07 | 5.64E-01        | 1.03E-01        | <b>1.87E-06</b> |
| rs7971754  | <i>CUX2</i>    | 12  | 111565969 | 8.95E-07 | 4.56E-01        | 3.17E-01        | <b>1.74E-04</b> |
| rs17153000 |                | 8   | 11084501  | 9.23E-07 | 6.02E-01        | 1.03E-01        | <b>1.10E-05</b> |
| rs17033506 |                | 3   | 35639826  | 9.63E-07 | 4.14E-01        | 8.33E-02        | <b>4.46E-07</b> |
| rs6816491  |                | 4   | 69702631  | 9.63E-07 | 3.98E-01        | 5.88E-02        | <b>3.14E-03</b> |
| rs7770848  |                | 6   | 44769237  | 9.63E-07 | 1.57E-01        | 1.03E-01        | <b>2.09E-07</b> |
| rs2537798  |                | 12  | 10417260  | 9.63E-07 | 6.12E-01        | 8.33E-02        | <b>1.39E-04</b> |
| rs6721181  |                | 2   | 40115696  | 1.24E-06 | <b>2.54E-02</b> | 7.06E-01        | <b>6.05E-07</b> |
| rs17024537 | <i>RBMS3</i>   | 3   | 29923279  | 1.24E-06 | 1.00E+00        | 4.14E-01        | <b>1.23E-04</b> |
| rs571525   |                | 3   | 118162866 | 1.24E-06 | NA              | NA              | NA              |
| rs13110640 |                | 4   | 189471705 | 1.24E-06 | 4.39E-01        | 5.88E-02        | <b>6.79E-05</b> |
| rs11833585 | <i>SYT1</i>    | 12  | 79394379  | 1.29E-06 | 8.66E-01        | 1.27E-01        | <b>1.60E-04</b> |
| rs4940107  |                | 18  | 49142762  | 1.39E-06 | 4.80E-01        | 7.06E-01        | <b>6.65E-05</b> |
| rs991941   |                | 3   | 26268068  | 1.50E-06 | <b>2.54E-02</b> | 1.80E-01        | <b>1.56E-04</b> |
| rs2023590  |                | 14  | 48151433  | 1.50E-06 | <b>4.55E-02</b> | 8.33E-02        | <b>3.86E-05</b> |
| rs1188866  | <i>REPS1</i>   | 6   | 139227575 | 1.52E-06 | 6.80E-01        | 4.84E-01        | <b>2.64E-05</b> |
| rs11141597 |                | 9   | 89527458  | 1.53E-06 | 8.33E-02        | 1.00E+00        | <b>2.03E-06</b> |
| rs9477834  |                | 6   | 18713337  | 1.57E-06 | 1.57E-01        | 1.00E+00        | <b>2.76E-03</b> |
| rs17069881 |                | 13  | 79017249  | 1.57E-06 | 7.39E-01        | NA              | NA              |
| rs11164749 |                | 1   | 103703923 | 1.62E-06 | NA              | NA              | NA              |
| rs325596   |                | 4   | 165384019 | 1.62E-06 | 5.78E-01        | 5.64E-01        | <b>2.72E-04</b> |
| rs2722324  | <i>SFRP4</i>   | 7   | 37948419  | 1.62E-06 | 8.08E-01        | 1.80E-01        | <b>1.94E-04</b> |
| rs886448   |                | 7   | 24240165  | 1.62E-06 | 8.33E-02        | 8.33E-02        | <b>7.24E-08</b> |
| rs1188883  | <i>REPS1</i>   | 6   | 139260691 | 2.01E-06 | 5.32E-01        | 7.77E-01        | <b>9.74E-06</b> |

|            |                |    |           |          |                 |                 |                 |
|------------|----------------|----|-----------|----------|-----------------|-----------------|-----------------|
| rs13246423 |                | 7  | 19420846  | 2.07E-06 | 1.00E+00        | 3.17E-01        | <b>1.54E-05</b> |
| rs12256404 | <i>SFMBT2</i>  | 10 | 7287771   | 2.10E-06 | NA              | 3.17E-01        | NA              |
| rs11840504 |                | 13 | 63357351  | 2.28E-06 | 5.32E-01        | 5.64E-01        | <b>1.28E-05</b> |
| rs10916563 |                | 1  | 229985395 | 2.52E-06 | 3.17E-01        | NA              | NA              |
| rs6900407  |                | 6  | 17238649  | 2.52E-06 | 7.06E-01        | 1.03E-01        | <b>1.08E-04</b> |
| rs7807274  | <i>MKLN1</i>   | 7  | 131021099 | 2.52E-06 | 6.06E-02        | 1.00E+00        | <b>3.82E-06</b> |
| rs7312640  | <i>CNTN1</i>   | 12 | 41190744  | 2.52E-06 | 3.71E-01        | 7.39E-01        | <b>9.22E-05</b> |
| rs12326216 | <i>DLGAP1</i>  | 18 | 3854905   | 2.52E-06 | 1.31E-01        | <b>1.26E-02</b> | <b>2.26E-03</b> |
| rs6503930  | <i>CLTC</i>    | 17 | 57698736  | 2.56E-06 | 1.82E-01        | 8.27E-01        | <b>3.77E-04</b> |
| rs13336239 | <i>TEKT5</i>   | 16 | 10722412  | 2.60E-06 | NA              | 3.17E-01        | NA              |
| rs9902627  |                | 17 | 19370568  | 2.60E-06 | NA              | 5.64E-01        | NA              |
| rs7527074  | <i>XPR1</i>    | 1  | 180645441 | 2.73E-06 | 8.81E-02        | 6.55E-01        | <b>9.49E-06</b> |
| rs909481   |                | 1  | 34888152  | 2.73E-06 | NA              | <b>1.43E-02</b> | NA              |
| rs13419784 |                | 2  | 196061261 | 2.73E-06 | 7.39E-01        | 1.57E-01        | <b>1.35E-05</b> |
| rs11926007 |                | 3  | 153653071 | 2.73E-06 | 1.06E-01        | 4.14E-01        | <b>1.74E-05</b> |
| rs9883878  |                | 3  | 177855632 | 2.73E-06 | <b>2.91E-02</b> | 1.00E+00        | <b>1.29E-06</b> |
| rs17218161 |                | 4  | 59213845  | 2.73E-06 | 1.57E-01        | <b>4.68E-03</b> | <b>1.54E-08</b> |
| rs17133682 | <i>C7ORF72</i> | 7  | 50142953  | 2.73E-06 | 4.80E-01        | 1.80E-01        | <b>1.01E-04</b> |
| rs10093753 | <i>TRIM55</i>  | 8  | 67076593  | 2.73E-06 | 4.67E-01        | 5.64E-01        | <b>6.02E-05</b> |
| rs4242987  |                | 13 | 56070736  | 2.73E-06 | NA              | 1.80E-01        | NA              |
| rs16952865 |                | 18 | 44969842  | 2.73E-06 | 4.33E-01        | 4.80E-01        | <b>7.53E-03</b> |
| rs7513668  |                | 1  | 222295588 | 2.98E-06 | 5.32E-01        | 1.00E+00        | <b>1.94E-04</b> |
| rs13361976 |                | 5  | 84196112  | 3.44E-06 | 8.27E-01        | 1.00E+00        | <b>3.12E-04</b> |
| rs11072541 | <i>RYR3</i>    | 15 | 33847380  | 3.44E-06 | 5.27E-01        | 3.17E-01        | <b>9.76E-06</b> |
| rs9664323  | <i>CUBN</i>    | 10 | 17094675  | 3.67E-06 | 4.05E-01        | 7.63E-01        | <b>2.85E-05</b> |
| rs9297216  |                | 8  | 34045261  | 3.82E-06 | <b>3.96E-02</b> | 8.35E-01        | <b>1.01E-06</b> |
| rs9483154  |                | 6  | 130945122 | 3.90E-06 | NA              | NA              | NA              |
| rs7563611  |                | 2  | 74337039  | 4.23E-06 | 1.97E-01        | <b>4.55E-02</b> | <b>9.11E-04</b> |
| rs9823506  | <i>ABI3BP</i>  | 3  | 100476713 | 4.23E-06 | <b>1.14E-02</b> | 1.57E-01        | <b>5.79E-08</b> |
| rs41330046 | <i>CSMD1</i>   | 8  | 3787060   | 4.23E-06 | 3.71E-01        | <b>2.54E-02</b> | <b>6.89E-04</b> |
| rs16913811 | <i>C9ORF5</i>  | 9  | 111861345 | 4.23E-06 | 1.34E-01        | <b>4.55E-02</b> | <b>1.75E-03</b> |
| rs16958402 | <i>LCN</i>     | 13 | 101770876 | 4.23E-06 | 5.49E-01        | 8.33E-02        | <b>6.79E-05</b> |
| rs17005379 |                | 1  | 219564331 | 4.59E-06 | NA              | <b>1.43E-02</b> | NA              |
| rs17105619 |                | 1  | 81352846  | 4.59E-06 | 1.34E-01        | 1.00E+00        | <b>1.54E-05</b> |
| rs17037715 |                | 4  | 108387921 | 4.59E-06 | 7.15E-01        | 1.80E-01        | <b>5.12E-04</b> |
| rs35141484 | <i>KLHL5</i>   | 4  | 39088341  | 4.59E-06 | 2.57E-01        | <b>1.43E-02</b> | <b>2.68E-07</b> |
| rs6816195  |                | 4  | 90049222  | 4.59E-06 | 6.95E-01        | <b>4.68E-03</b> | <b>2.72E-04</b> |
| rs16892337 |                | 5  | 63139240  | 4.59E-06 | 9.56E-02        | 7.06E-01        | <b>1.77E-04</b> |
| rs9443694  |                | 6  | 80451365  | 4.59E-06 | 1.32E-01        | <b>4.55E-02</b> | <b>8.58E-04</b> |
| rs17170211 | <i>BBS9</i>    | 7  | 33419486  | 4.59E-06 | 7.82E-01        | 3.17E-01        | <b>3.86E-04</b> |
| rs9300554  |                | 13 | 88236464  | 4.59E-06 | 2.48E-01        | NA              | NA              |
| rs17112657 |                | 14 | 27854927  | 4.59E-06 | 4.91E-01        | <b>4.55E-02</b> | <b>2.43E-05</b> |
| rs690101   |                | 15 | 53402646  | 4.59E-06 | 4.39E-01        | 1.57E-01        | <b>1.18E-03</b> |

|            |               |    |           |          |                 |                 |                 |
|------------|---------------|----|-----------|----------|-----------------|-----------------|-----------------|
| rs1527119  | <i>SYT1</i>   | 12 | 79440014  | 4.98E-06 | 6.83E-01        | 2.01E-01        | <b>1.64E-04</b> |
| rs1212985  | <i>REPS1</i>  | 6  | 139227530 | 5.25E-06 | 4.33E-01        | 3.36E-01        | <b>5.51E-05</b> |
| rs12059584 | <i>CHRM3</i>  | 1  | 239905189 | 5.57E-06 | 2.48E-01        | 8.33E-02        | <b>1.39E-04</b> |
| rs7217884  | <i>STAT5A</i> | 17 | 40447500  | 5.57E-06 | 7.58E-01        | 1.66E-01        | <b>2.84E-04</b> |
| rs10963170 | <i>SH3GL2</i> | 9  | 17636337  | 5.93E-06 | NA              | NA              | NA              |
| rs7798651  | <i>GT3</i>    | 7  | 80092919  | 6.13E-06 | 8.47E-01        | <b>8.15E-03</b> | <b>1.47E-05</b> |
| rs7174702  |               | 15 | 23764447  | 6.25E-06 | 4.46E-01        | 1.00E+00        | <b>1.83E-05</b> |
| rs8073039  |               | 17 | 57521208  | 6.65E-06 | 8.51E-02        | 3.43E-01        | <b>2.24E-04</b> |
| rs6826929  |               | 4  | 32239198  | 6.79E-06 | 6.95E-01        | 7.06E-01        | <b>4.18E-04</b> |
| rs11164524 |               | 1  | 102949407 | 7.10E-06 | 1.28E-01        | 1.57E-01        | <b>1.90E-05</b> |
| rs16863100 |               | 2  | 176100049 | 7.10E-06 | <b>4.12E-02</b> | <b>1.43E-02</b> | <b>1.43E-02</b> |
| rs6925916  |               | 6  | 132291895 | 7.10E-06 | 4.14E-01        | <b>4.55E-02</b> | <b>3.18E-05</b> |
| rs9301462  | <i>RAB20</i>  | 13 | 111207865 | 7.10E-06 | 8.82E-01        | <b>2.70E-03</b> | <b>2.91E-04</b> |
| rs17110658 |               | 14 | 40906076  | 7.10E-06 | 1.00E+00        | 5.93E-01        | <b>1.57E-03</b> |
| rs7231244  |               | 18 | 56307666  | 7.10E-06 | 3.46E-01        | <b>8.15E-03</b> | <b>3.55E-04</b> |
| rs1628500  |               | 1  | 95052961  | 7.12E-06 | NA              | NA              | NA              |
| rs12270017 |               | 11 | 4585036   | 7.42E-06 | 6.37E-01        | 5.64E-01        | <b>4.10E-04</b> |
| rs4484888  |               | 1  | 80652389  | 7.74E-06 | 1.80E-01        | 3.17E-01        | <b>2.43E-05</b> |

**Table S2: Top 100 SNPs of African-American population.** SNPs are ordered by p-values in the African American population (P2). When available, their p-values in European Americans (P1), Hispanic Americans (P3), and the mega-analysis (P123) are provided. P-values in bold are < 0.05.

| rsID       | Gene           | Chr | BP        | P2       | P1              | P3              | P123            |
|------------|----------------|-----|-----------|----------|-----------------|-----------------|-----------------|
| rs1859699  |                | 7   | 41065647  | 9.76E-06 | 7.01E-01        | 7.68E-01        | 8.81E-02        |
| rs11259166 | <i>FAM107B</i> | 10  | 14580332  | 1.19E-05 | 2.10E-01        | 5.13E-01        | <b>2.28E-02</b> |
| rs11259167 | <i>FAM107B</i> | 10  | 14580439  | 1.19E-05 | 3.32E-01        | 5.13E-01        | <b>4.38E-02</b> |
| rs6981891  |                | 8   | 55391896  | 1.95E-05 | 2.27E-01        | 7.39E-01        | <b>1.83E-02</b> |
| rs13004344 | <i>LRP1B</i>   | 2   | 142606736 | 2.21E-05 | 6.82E-01        | NA              | NA              |
| rs6463967  |                | 7   | 10122140  | 2.43E-05 | <b>3.64E-02</b> | 9.56E-02        | 8.29E-01        |
| rs2627230  |                | 6   | 134379869 | 3.22E-05 | 3.55E-01        | 2.89E-01        | 9.24E-01        |
| rs12873436 |                | 13  | 40868378  | 3.74E-05 | 2.00E-01        | 3.84E-01        | 8.85E-01        |
| rs11081393 |                | 18  | 8524099   | 3.74E-05 | 3.23E-01        | 3.17E-01        | 7.56E-01        |
| rs7602460  |                | 2   | 182261869 | 3.83E-05 | 4.77E-01        | 4.35E-01        | <b>3.42E-02</b> |
| rs2221480  |                | 18  | 69489748  | 3.96E-05 | 1.87E-01        | 5.90E-01        | 8.85E-01        |
| rs10811095 | <i>FAM154A</i> | 9   | 19010440  | 5.31E-05 | 1.40E-01        | 3.84E-01        | 8.79E-01        |
| rs758240   | <i>ENTPD5</i>  | 14  | 74441345  | 5.31E-05 | 1.08E-01        | 6.62E-01        | <b>1.01E-02</b> |
| rs1678316  |                | 4   | 8336829   | 5.90E-05 | 1.00E+00        | 3.17E-01        | <b>1.01E-04</b> |
| rs1145047  | <i>CNTN4</i>   | 3   | 2364499   | 6.02E-05 | 2.83E-01        | 7.36E-02        | 7.93E-01        |
| rs7926724  | <i>TMEM135</i> | 11  | 87037565  | 6.02E-05 | 3.44E-01        | 3.43E-01        | 5.55E-01        |
| rs11621114 | <i>ENTPD5</i>  | 14  | 74460095  | 6.02E-05 | <b>3.02E-02</b> | 1.00E+00        | <b>1.82E-03</b> |
| rs12712960 | <i>PRKCE</i>   | 2   | 46277923  | 8.87E-05 | 7.53E-01        | 7.32E-01        | 2.96E-01        |
| rs1153481  | <i>CNTN4</i>   | 3   | 2365123   | 8.87E-05 | 4.56E-01        | <b>4.95E-02</b> | 6.55E-01        |

|            |                 |    |           |          |                 |                 |                 |
|------------|-----------------|----|-----------|----------|-----------------|-----------------|-----------------|
| rs10508477 | <i>FAM107B</i>  | 10 | 14598740  | 9.22E-05 | 9.22E-01        | 7.73E-01        | 1.47E-01        |
| rs11890111 |                 | 2  | 130446787 | 9.45E-05 | 5.47E-01        | 8.08E-01        | 4.44E-01        |
| rs3764859  | <i>COQ6</i>     | 14 | 74425056  | 9.45E-05 | <b>4.42E-02</b> | 8.89E-01        | <b>2.92E-03</b> |
| rs16832258 | <i>STXBP5L</i>  | 3  | 121047942 | 9.62E-05 | 3.17E-01        | 8.33E-02        | <b>6.71E-03</b> |
| rs10000521 |                 | 4  | 126459422 | 9.62E-05 | 1.80E-01        | NA              | NA              |
| rs12785053 | <i>INPP5F</i>   | 10 | 121583965 | 9.64E-05 | 4.48E-01        | 5.32E-01        | 8.43E-02        |
| rs10204473 |                 | 2  | 45492633  | 1.01E-04 | 4.42E-01        | 3.76E-01        | 5.15E-01        |
| rs1720009  |                 | 4  | 8336465   | 1.01E-04 | 1.00E+00        | 3.17E-01        | <b>2.31E-04</b> |
| rs10906697 | <i>FAM107B</i>  | 10 | 14599229  | 1.08E-04 | 9.61E-01        | 5.64E-01        | 1.25E-01        |
| rs12702976 |                 | 7  | 10121066  | 1.15E-04 | 1.69E-01        | 6.70E-01        | 4.23E-01        |
| rs350224   | <i>SNX29</i>    | 16 | 12241873  | 1.15E-04 | 5.49E-01        | 1.97E-01        | 1.23E-01        |
| rs340779   |                 | 2  | 16508277  | 1.23E-04 | 8.72E-01        | 5.37E-01        | 2.99E-01        |
| rs4766046  | <i>TSPAN9</i>   | 12 | 3222714   | 1.24E-04 | 2.05E-01        | 4.75E-01        | 7.84E-02        |
| rs12023601 |                 | 1  | 102881189 | 1.26E-04 | 7.43E-01        | 8.73E-01        | 3.05E-01        |
| rs11687681 |                 | 2  | 11572815  | 1.26E-04 | 3.32E-01        | 1.57E-01        | 8.91E-01        |
| rs555210   |                 | 11 | 95096136  | 1.26E-04 | 6.96E-01        | 3.17E-01        | 2.33E-01        |
| rs4269201  |                 | 4  | 76283179  | 1.38E-04 | 9.57E-01        | 1.28E-01        | 1.11E-01        |
| rs4831113  |                 | 3  | 115308015 | 1.45E-04 | 1.43E-01        | 5.64E-01        | 7.81E-01        |
| rs1988530  |                 | 11 | 18990515  | 1.45E-04 | NA              | 7.63E-01        | NA              |
| rs1499975  |                 | 3  | 117802643 | 1.56E-04 | 2.41E-01        | 6.22E-01        | 9.23E-01        |
| rs11099892 | <i>KIAA0922</i> | 4  | 154553693 | 1.56E-04 | 2.89E-01        | 7.15E-01        | <b>4.62E-02</b> |
| rs11621118 | <i>ENTPD5</i>   | 14 | 74460126  | 1.56E-04 | 1.31E-01        | 4.56E-01        | <b>1.88E-02</b> |
| rs12095330 |                 | 1  | 83266513  | 1.57E-04 | 1.00E+00        | 1.00E+00        | <b>6.04E-04</b> |
| rs4656264  |                 | 1  | 160427955 | 1.57E-04 | 1.00E+00        | 1.00E+00        | <b>2.57E-03</b> |
| rs4656265  |                 | 1  | 160427986 | 1.57E-04 | 1.00E+00        | 1.00E+00        | <b>2.03E-03</b> |
| rs480745   |                 | 1  | 83269970  | 1.57E-04 | 4.14E-01        | 1.00E+00        | <b>2.46E-04</b> |
| rs2588524  |                 | 2  | 145965660 | 1.57E-04 | 1.57E-01        | 5.64E-01        | <b>9.41E-04</b> |
| rs476986   |                 | 3  | 55493514  | 1.57E-04 | 1.00E+00        | 8.19E-01        | 2.73E-01        |
| rs1853308  |                 | 6  | 44551199  | 1.57E-04 | 1.00E+00        | 1.00E+00        | <b>4.07E-04</b> |
| rs2473967  |                 | 6  | 113479335 | 1.57E-04 | <b>1.82E-03</b> | 3.17E-01        | <b>2.31E-06</b> |
| rs1384651  |                 | 11 | 18987250  | 1.57E-04 | 2.25E-01        | 5.64E-01        | <b>5.32E-04</b> |
| rs6669249  | <i>ALG14</i>    | 1  | 95531373  | 1.61E-04 | 3.34E-01        | 8.73E-01        | 8.38E-01        |
| rs17407964 |                 | 1  | 95424669  | 1.62E-04 | 3.25E-01        | 4.39E-01        | <b>1.58E-02</b> |
| rs13428810 |                 | 2  | 154254260 | 1.62E-04 | 5.44E-01        | <b>2.01E-02</b> | 2.77E-01        |
| rs9986776  |                 | 7  | 53992161  | 1.62E-04 | 5.64E-01        | 3.17E-01        | <b>2.84E-03</b> |
| rs725441   | <i>MCPH1</i>    | 8  | 6263136   | 1.62E-04 | 3.17E-01        | 8.33E-02        | <b>2.38E-05</b> |
| rs7948162  |                 | 11 | 97931529  | 1.62E-04 | 9.19E-01        | 7.32E-01        | 3.22E-01        |
| rs16964987 | <i>PIEZO1</i>   | 16 | 88848279  | 1.62E-04 | 3.17E-01        | 5.64E-01        | <b>1.32E-03</b> |
| rs12331558 |                 | 4  | 158479475 | 1.75E-04 | 5.84E-01        | 3.36E-01        | 5.47E-02        |
| rs4915564  |                 | 1  | 197777147 | 1.83E-04 | 4.14E-01        | 4.75E-01        | 7.78E-02        |
| rs1490548  |                 | 3  | 153254260 | 1.83E-04 | 1.96E-01        | 2.89E-01        | <b>2.59E-02</b> |
| rs11052629 |                 | 12 | 33495533  | 1.94E-04 | 6.09E-01        | 3.98E-01        | 1.59E-01        |
| rs10739194 | <i>PTPRD</i>    | 9  | 9528291   | 2.08E-04 | 8.14E-01        | 1.00E+00        | 3.46E-01        |

|            |                |    |           |          |                 |          |                 |
|------------|----------------|----|-----------|----------|-----------------|----------|-----------------|
| rs10995946 |                | 10 | 66406460  | 2.08E-04 | NA              | NA       | NA              |
| rs6590392  |                | 11 | 129412688 | 2.13E-04 | 1.00E+00        | 7.39E-01 | <b>3.35E-02</b> |
| rs9961693  |                | 18 | 59280655  | 2.13E-04 | 2.54E-01        | 3.17E-01 | 6.91E-01        |
| rs11914436 | <i>STXBP5L</i> | 3  | 121123223 | 2.31E-04 | <b>1.75E-03</b> | 3.17E-01 | 2.54E-01        |
| rs350302   |                | 5  | 62429113  | 2.31E-04 | 3.12E-01        | 7.52E-01 | 8.18E-01        |
| rs7706809  | <i>SRD5A1</i>  | 5  | 6635971   | 2.31E-04 | 7.86E-01        | 2.74E-01 | 3.05E-01        |
| rs609887   |                | 11 | 102384567 | 2.31E-04 | 1.85E-01        | 3.30E-01 | 8.47E-01        |
| rs2210449  | <i>KLHL1</i>   | 13 | 70500548  | 2.31E-04 | 1.03E-01        | 5.49E-01 | <b>5.33E-03</b> |
| rs16958724 | <i>CDH13</i>   | 16 | 82864309  | 2.31E-04 | 1.15E-01        | 4.91E-01 | 7.44E-01        |
| rs7763441  |                | 6  | 2452697   | 2.36E-04 | 7.34E-01        | 8.91E-01 | 1.64E-01        |
| rs12701859 |                | 7  | 41072834  | 2.36E-04 | 5.93E-01        | 4.75E-01 | 3.81E-01        |
| rs11170028 |                | 12 | 52558838  | 2.36E-04 | 8.87E-01        | 6.47E-01 | 3.88E-01        |
| rs7978283  |                | 12 | 52559310  | 2.36E-04 | 9.63E-01        | 4.56E-01 | 3.94E-01        |
| rs2074932  | <i>ENTPD5</i>  | 14 | 74441684  | 2.36E-04 | 1.32E-01        | 5.55E-01 | <b>1.91E-02</b> |
| rs10513425 | <i>MBNL1</i>   | 3  | 152071820 | 2.39E-04 | 9.42E-01        | 6.37E-01 | 2.61E-01        |
| rs6766293  |                | 3  | 95797766  | 2.39E-04 | 4.48E-01        | 6.12E-01 | 7.00E-02        |
| rs16887640 |                | 5  | 17769086  | 2.39E-04 | 5.64E-01        | NA       | NA              |
| rs2023910  |                | 7  | 21557854  | 2.39E-04 | 9.05E-01        | 1.57E-01 | 1.90E-01        |
| rs6483631  | <i>V2</i>      | 11 | 20050891  | 2.39E-04 | 1.85E-01        | 1.00E+00 | <b>2.07E-02</b> |
| rs853751   |                | 1  | 214043781 | 2.46E-04 | 9.09E-01        | 3.69E-01 | 1.34E-01        |
| rs1517631  |                | 2  | 224182549 | 2.46E-04 | 5.06E-02        | 5.88E-02 | <b>4.44E-04</b> |
| rs645486   |                | 3  | 55492326  | 2.56E-04 | 8.66E-01        | 8.19E-01 | 4.31E-01        |
| rs11259158 | <i>FAM107B</i> | 10 | 14574784  | 2.56E-04 | 3.42E-01        | 6.70E-01 | 6.38E-02        |
| rs589524   | <i>NBEA</i>    | 13 | 35731964  | 2.56E-04 | 1.15E-01        | 4.14E-01 | 5.93E-01        |
| rs173088   |                | 16 | 66182658  | 2.56E-04 | 8.46E-01        | 5.32E-01 | 1.40E-01        |
| rs17085106 |                | 18 | 69439073  | 2.56E-04 | 4.50E-01        | 1.00E+00 | <b>2.75E-03</b> |
| rs8099373  |                | 18 | 69441644  | 2.56E-04 | 7.06E-01        | 6.55E-01 | <b>4.51E-03</b> |
| rs10157718 | <i>RYR2</i>    | 1  | 237256977 | 2.57E-04 | <b>3.43E-02</b> | 5.49E-01 | 1.59E-01        |
| rs1470756  |                | 2  | 105449455 | 2.57E-04 | 7.46E-01        | 6.02E-01 | 2.36E-01        |
| rs2550736  |                | 16 | 81437197  | 2.61E-04 | 7.74E-01        | 8.66E-01 | 4.66E-01        |
| rs11706848 | <i>SUCLG2</i>  | 3  | 67661012  | 2.66E-04 | 1.84E-01        | 4.23E-01 | 8.93E-01        |
| rs2242022  | <i>SUCLG2</i>  | 3  | 67664229  | 2.66E-04 | 2.83E-01        | 3.30E-01 | 6.89E-01        |
| rs2190342  |                | 7  | 41049998  | 2.66E-04 | 1.00E+00        | 6.68E-01 | 2.22E-01        |
| rs4454200  |                | 7  | 41067691  | 2.66E-04 | 8.85E-01        | 6.55E-01 | 1.76E-01        |
| rs1393367  |                | 3  | 79906109  | 2.72E-04 | 5.56E-01        | 7.52E-01 | 1.02E-01        |
| rs9830013  |                | 3  | 79902813  | 2.72E-04 | 8.44E-01        | 7.52E-01 | 1.99E-01        |
| rs7688638  |                | 4  | 25067806  | 2.72E-04 | <b>2.62E-02</b> | 8.86E-01 | <b>1.34E-03</b> |
| rs11781516 | <i>ZMAT4</i>   | 8  | 40554742  | 2.72E-04 | 1.48E-01        | 2.28E-01 | 6.33E-01        |

**Table S3: Top 100 SNPs of Hispanic population.** SNPs are ordered by p-values in the Hispanic American population (P3). When available, their p-values in European Americans (P1), African Americans (P2), and the mega-analysis (P123) are provided. P-values in bold are < 0.05.

| rsID       | Gene           | Chr | BP        | P3       | P1              | P2              | P123            |
|------------|----------------|-----|-----------|----------|-----------------|-----------------|-----------------|
| rs1472216  | <i>GRIP1</i>   | 12  | 66834976  | 4.20E-07 | 8.81E-01        | 5.64E-01        | 2.58E-01        |
| rs7304118  | <i>GRIP1</i>   | 12  | 66842135  | 1.29E-06 | 9.60E-01        | 1.44E-01        | 8.15E-02        |
| rs11176183 | <i>GRIP1</i>   | 12  | 66835453  | 2.10E-06 | 1.00E+00        | 6.62E-01        | 2.20E-01        |
| rs326418   |                | 3   | 7895867   | 3.42E-06 | 9.56E-01        | 6.68E-01        | 1.87E-01        |
| rs10052887 |                | 5   | 174183518 | 3.44E-06 | 7.39E-01        | <b>4.23E-02</b> | <b>2.66E-02</b> |
| rs4704459  |                | 5   | 77210209  | 1.95E-05 | 8.70E-01        | 2.01E-01        | 1.04E-01        |
| rs7134081  | <i>GRIP1</i>   | 12  | 66858047  | 2.01E-05 | 7.31E-01        | 3.27E-01        | 3.28E-01        |
| rs1776262  |                | 20  | 60516023  | 2.47E-05 | 9.55E-01        | 2.89E-01        | 2.83E-01        |
| rs1831463  | <i>GPC5</i>    | 13  | 92908890  | 2.48E-05 | 1.93E-01        | 1.17E-01        | 6.01E-01        |
| rs6511312  |                | 19  | 22205349  | 2.48E-05 | 3.88E-01        | 1.49E-01        | 9.65E-01        |
| rs7196508  | <i>RBFOX1</i>  | 16  | 6898606   | 3.86E-05 | 4.32E-01        | 1.00E+00        | 6.39E-02        |
| rs7987675  | <i>GPC5</i>    | 13  | 92884370  | 3.94E-05 | 9.18E-02        | 2.97E-01        | 1.00E+00        |
| rs2634737  | <i>SUCLG2</i>  | 3   | 67608349  | 3.96E-05 | 6.98E-01        | 6.55E-01        | 5.79E-02        |
| rs6845962  |                | 4   | 36789707  | 3.96E-05 | 3.72E-01        | 8.58E-01        | 5.37E-02        |
| rs929131   |                | 22  | 26844769  | 4.46E-05 | 9.23E-01        | 5.16E-01        | 5.45E-02        |
| rs7132670  | <i>GRIP1</i>   | 12  | 66861112  | 5.70E-05 | 9.08E-01        | 4.84E-01        | 4.37E-01        |
| rs11016928 | <i>DOCK1</i>   | 10  | 129047571 | 6.02E-05 | 5.61E-02        | 5.13E-01        | <b>1.61E-03</b> |
| rs4849907  |                | 2   | 121343006 | 6.25E-05 | 8.84E-01        | 8.69E-01        | 2.26E-01        |
| rs490662   |                | 16  | 5454486   | 6.25E-05 | 6.37E-01        | 1.57E-01        | 2.37E-01        |
| rs2164169  | <i>DEFB129</i> | 20  | 206402    | 6.25E-05 | <b>7.36E-03</b> | 4.56E-01        | 1.30E-01        |
| rs17604918 | <i>KCTD1</i>   | 18  | 24078160  | 6.33E-05 | 8.60E-01        | 8.81E-02        | <b>4.36E-02</b> |
| rs204670   |                | 20  | 536536    | 7.44E-05 | 2.01E-01        | 4.80E-01        | 9.47E-01        |
| rs391664   |                | 3   | 7891262   | 7.50E-05 | 4.96E-01        | 4.14E-01        | 7.27E-01        |
| rs1159974  |                | 6   | 126090277 | 8.20E-05 | 9.25E-01        | 6.12E-01        | 3.39E-01        |
| rs9388451  |                | 6   | 126090377 | 8.20E-05 | 9.62E-01        | 5.64E-01        | 2.00E-01        |
| rs9398787  |                | 6   | 126090608 | 8.20E-05 | 9.24E-01        | 8.53E-01        | 2.54E-01        |
| rs13486    | <i>CPM</i>     | 12  | 69249087  | 8.77E-05 | <b>3.65E-02</b> | <b>3.89E-03</b> | 9.17E-01        |
| rs3741599  | <i>CPM</i>     | 12  | 69250481  | 8.77E-05 | <b>3.27E-02</b> | 2.01E-01        | 5.83E-01        |
| rs958187   | <i>IFI27L2</i> | 14  | 94594768  | 8.77E-05 | 5.15E-01        | 4.14E-01        | 5.06E-02        |
| rs11711367 | <i>GRM7</i>    | 3   | 7077524   | 9.45E-05 | 2.88E-01        | 3.30E-01        | 6.45E-01        |
| rs7245790  | <i>ZNF492</i>  | 19  | 22320009  | 9.45E-05 | <b>1.54E-02</b> | 5.05E-01        | 2.04E-01        |
| rs8103471  | <i>ZNF492</i>  | 19  | 22317314  | 9.45E-05 | <b>1.78E-02</b> | 5.05E-01        | 2.21E-01        |
| rs6089568  |                | 20  | 60533715  | 9.45E-05 | 9.60E-01        | 3.46E-01        | 2.99E-01        |
| rs13117183 |                | 4   | 43156439  | 9.62E-05 | 8.44E-01        | 5.88E-02        | 5.76E-01        |
| rs11120499 | <i>KCNK2</i>   | 1   | 215298808 | 9.64E-05 | 3.57E-01        | 7.52E-01        | <b>4.82E-02</b> |
| rs10209630 | <i>STK39</i>   | 2   | 169012258 | 9.64E-05 | 1.00E+00        | 1.00E+00        | 1.58E-01        |
| rs11687036 | <i>RASGRP3</i> | 2   | 33753366  | 9.64E-05 | 4.93E-01        | 6.22E-01        | 6.49E-01        |
| rs2023068  | <i>PARK2</i>   | 6   | 162664364 | 1.01E-04 | 1.78E-01        | 1.00E+00        | 1.00E+00        |
| rs10733978 |                | 10  | 59576417  | 1.01E-04 | 6.50E-02        | 7.24E-01        | 4.15E-01        |



|            |                |    |           |          |                 |                 |                 |
|------------|----------------|----|-----------|----------|-----------------|-----------------|-----------------|
| rs7086393  |                | 10 | 58250470  | 1.01E-04 | 2.05E-01        | 1.05E-01        | 7.90E-02        |
| rs7478060  |                | 10 | 59607273  | 1.01E-04 | 6.69E-02        | 7.82E-02        | 2.28E-01        |
| rs2904515  | <i>GRIP1</i>   | 12 | 66863923  | 1.01E-04 | 3.12E-01        | 8.86E-01        | 5.94E-02        |
| rs3891950  | <i>GRIP1</i>   | 12 | 66863842  | 1.01E-04 | 5.75E-01        | 8.86E-01        | 1.38E-01        |
| rs17545624 |                | 19 | 31340752  | 1.01E-04 | 9.57E-01        | 8.27E-01        | 2.10E-01        |
| rs6429695  | <i>KAZN</i>    | 1  | 15273115  | 1.26E-04 | 7.19E-01        | 8.27E-01        | 1.07E-01        |
| rs11128174 |                | 3  | 66706426  | 1.26E-04 | 8.74E-01        | 7.07E-02        | 7.90E-02        |
| rs9321054  | <i>HEY2</i>    | 6  | 126079968 | 1.26E-04 | 7.76E-01        | 5.64E-01        | 3.12E-01        |
| rs498768   |                | 12 | 63759333  | 1.26E-04 | <b>3.88E-02</b> | 5.08E-01        | <b>1.39E-03</b> |
| rs6705911  | <i>PPP1R1C</i> | 2  | 182979076 | 1.38E-04 | 7.73E-01        | 2.21E-01        | 2.63E-01        |
| rs225885   |                | 14 | 30471987  | 1.38E-04 | 6.39E-01        | 4.75E-01        | 3.27E-01        |
| rs1793476  | <i>GDPD4</i>   | 11 | 76992664  | 1.39E-04 | 5.56E-01        | 3.07E-01        | 1.47E-01        |
| rs6751259  | <i>SNTG2</i>   | 2  | 1064808   | 1.45E-04 | 2.18E-01        | 6.95E-01        | <b>3.71E-02</b> |
| rs1350431  | <i>PDZRN4</i>  | 12 | 41819315  | 1.45E-04 | 3.04E-01        | 1.05E-01        | <b>1.69E-02</b> |
| rs6686296  | <i>GRIK3</i>   | 1  | 37489380  | 1.48E-04 | 9.19E-01        | 4.23E-01        | 4.31E-01        |
| rs4778020  |                | 15 | 92726702  | 1.48E-04 | 3.29E-01        | 4.92E-01        | 8.51E-02        |
| rs10404620 | <i>ZNF492</i>  | 19 | 22316577  | 1.48E-04 | <b>1.35E-02</b> | 2.37E-01        | 1.34E-01        |
| rs6061921  |                | 20 | 60533512  | 1.48E-04 | 4.13E-01        | 1.44E-01        | 1.00E+00        |
| rs4424497  |                | 1  | 238629579 | 1.56E-04 | 6.90E-01        | 3.62E-01        | 7.20E-01        |
| rs2634743  | <i>SUCLG2</i>  | 3  | 67612285  | 1.56E-04 | 5.30E-01        | 6.55E-01        | 7.31E-02        |
| rs2772447  | <i>SUCLG2</i>  | 3  | 67613201  | 1.56E-04 | 5.79E-01        | 5.47E-01        | 9.33E-02        |
| rs6486070  | <i>TEAD1</i>   | 11 | 12932979  | 1.56E-04 | 2.31E-01        | 1.70E-01        | <b>4.26E-03</b> |
| rs2121798  |                | 3  | 74654727  | 1.57E-04 | 1.83E-01        | 6.80E-01        | <b>2.65E-02</b> |
| rs3747134  |                | 22 | 26877981  | 1.57E-04 | 9.36E-01        | 7.73E-01        | 1.32E-01        |
| rs739291   | <i>HPS4</i>    | 22 | 26877539  | 1.57E-04 | 8.11E-01        | 7.73E-01        | 1.02E-01        |
| rs6679536  | <i>DPYD</i>    | 1  | 97821302  | 1.61E-04 | 6.56E-02        | <b>4.74E-02</b> | <b>5.78E-04</b> |
| rs10405541 |                | 19 | 31343577  | 1.61E-04 | 8.27E-01        | 8.66E-01        | 2.14E-01        |
| rs10405722 |                | 19 | 31343593  | 1.61E-04 | 9.13E-01        | 7.15E-01        | 2.70E-01        |
| rs11085515 |                | 19 | 22426520  | 1.61E-04 | <b>1.37E-02</b> | 8.96E-01        | 2.05E-01        |
| rs17628232 |                | 19 | 31342269  | 1.61E-04 | 9.13E-01        | 1.00E+00        | 2.27E-01        |
| rs214341   | <i>CAPZB</i>   | 1  | 19680558  | 1.62E-04 | 7.75E-01        | 4.75E-01        | 3.35E-01        |
| rs6548183  | <i>SNTG2</i>   | 2  | 1076968   | 1.62E-04 | 1.94E-01        | <b>4.23E-02</b> | <b>2.58E-03</b> |
| rs1472476  | <i>GRM7</i>    | 3  | 7052542   | 1.62E-04 | 3.92E-01        | 2.37E-01        | 5.01E-01        |
| rs871262   |                | 10 | 59578395  | 1.62E-04 | 8.04E-02        | 7.39E-01        | 4.43E-01        |
| rs9804334  |                | 10 | 57850645  | 1.62E-04 | 7.00E-01        | 6.55E-01        | 2.49E-01        |
| rs11871636 | <i>RPL27</i>   | 17 | 41154817  | 1.62E-04 | 5.02E-01        | 1.00E+00        | 8.81E-02        |
| rs11085514 |                | 19 | 22425837  | 1.62E-04 | <b>3.53E-02</b> | 3.96E-01        | 2.17E-01        |
| rs17118414 |                | 1  | 59392781  | 1.83E-04 | 3.05E-01        | 5.64E-01        | <b>3.67E-02</b> |
| rs2352934  |                | 16 | 86187627  | 1.94E-04 | 3.37E-01        | 2.85E-01        | 1.05E-01        |
| rs5997093  | <i>HPS4</i>    | 22 | 26851828  | 2.08E-04 | 7.65E-01        | 8.66E-01        | 9.37E-02        |
| rs4568144  |                | 3  | 83952437  | 2.13E-04 | 2.45E-01        | 7.52E-01        | <b>4.13E-02</b> |
| rs1981933  |                | 4  | 76034791  | 2.13E-04 | 5.35E-01        | 3.17E-01        | 4.77E-01        |
| rs4771988  | <i>MBNL2</i>   | 13 | 97911563  | 2.13E-04 | 9.15E-01        | 8.66E-01        | 2.65E-01        |

|            |          |    |           |          |                 |                 |                 |
|------------|----------|----|-----------|----------|-----------------|-----------------|-----------------|
| rs17136317 | ZNF75A   | 16 | 3366513   | 2.13E-04 | 7.80E-01        | 8.82E-01        | 1.65E-01        |
| rs1978718  | ZNF492   | 19 | 22293126  | 2.31E-04 | <b>7.96E-03</b> | 7.52E-01        | 1.37E-01        |
| rs876426   |          | 2  | 72153022  | 2.39E-04 | 2.81E-01        | 8.82E-01        | <b>3.69E-02</b> |
| rs1481244  |          | 4  | 67839069  | 2.39E-04 | 2.23E-01        | 8.64E-02        | 4.90E-01        |
| rs4384322  |          | 10 | 57778783  | 2.39E-04 | 6.69E-01        | 3.04E-01        | 3.48E-01        |
| rs4782023  | XYLT1    | 16 | 17260044  | 2.46E-04 | 1.00E+00        | 1.00E+00        | 2.19E-01        |
| rs2079557  | ARHGAP44 | 17 | 12726712  | 2.46E-04 | 5.37E-01        | 8.86E-01        | 5.55E-01        |
| rs10805927 |          | 5  | 78843271  | 2.56E-04 | 2.62E-01        | 8.64E-02        | 1.31E-01        |
| rs4717436  |          | 7  | 67618930  | 2.56E-04 | 2.42E-01        | <b>3.43E-02</b> | 1.32E-01        |
| rs10138605 |          | 14 | 101135965 | 2.56E-04 | 8.82E-01        | 5.05E-01        | 1.24E-01        |
| rs13332693 |          | 16 | 75957806  | 2.56E-04 | 2.68E-01        | 8.66E-01        | <b>4.62E-02</b> |
| rs323496   | RUNDC1   | 17 | 41141971  | 2.56E-04 | 2.96E-01        | 6.02E-01        | 6.72E-02        |
| rs739289   | HPS4     | 22 | 26862153  | 2.56E-04 | 9.36E-01        | 4.56E-01        | 1.27E-01        |
| rs4878088  | DAPK1    | 9  | 90141193  | 2.57E-04 | 1.85E-01        | 1.80E-01        | 1.00E+00        |
| rs4576739  |          | 10 | 58261408  | 2.57E-04 | 4.03E-01        | 1.14E-01        | 2.04E-01        |
| rs4483759  |          | 13 | 45676009  | 2.57E-04 | 8.97E-01        | 1.70E-01        | 7.18E-02        |
| rs9567523  |          | 13 | 45660986  | 2.57E-04 | 1.00E+00        | 1.23E-01        | 8.26E-02        |
| rs12977165 |          | 19 | 31345459  | 2.57E-04 | 1.00E+00        | 8.47E-01        | 3.10E-01        |

**Table S4: Top 100 SNPs of the mega-analysis.** SNPs are ordered by p-values in the mega-analysis (P123). When available, their p-values in European Americans (P1), African Americans (P2), and Hispanic Americans (P3) are provided. P-values in bold are < 0.05.

| rsID       | Gene   | chr | BP        | P123     | P1              | P2              | P3              |
|------------|--------|-----|-----------|----------|-----------------|-----------------|-----------------|
| rs16929097 |        | 9   | 12521826  | 8.33E-09 | <b>1.81E-07</b> | <b>1.14E-02</b> | 4.14E-01        |
| rs17218161 |        | 4   | 59213845  | 1.54E-08 | <b>2.73E-06</b> | 1.57E-01        | <b>4.68E-03</b> |
| rs12570188 | HPSE2  | 10  | 100855702 | 4.60E-08 | <b>3.19E-07</b> | 8.33E-02        | 1.57E-01        |
| rs9823506  | ABI3BP | 3   | 100476713 | 5.79E-08 | <b>4.23E-06</b> | <b>1.14E-02</b> | 1.57E-01        |
| rs920672   | V2     | 11  | 20050143  | 5.79E-08 | <b>2.67E-05</b> | <b>1.43E-02</b> | <b>1.43E-02</b> |
| rs886448   |        | 7   | 24240165  | 7.24E-08 | <b>1.62E-06</b> | 8.33E-02        | 8.33E-02        |
| rs11000019 | PSAP   | 10  | 73591530  | 7.62E-08 | <b>4.46E-07</b> | 3.17E-01        | 8.33E-02        |
| rs6054973  |        | 20  | 7385958   | 1.11E-07 | <b>5.34E-07</b> | 1.66E-01        | <b>4.55E-02</b> |
| rs2292527  | FLCN   | 17  | 17126041  | 1.50E-07 | <b>8.81E-06</b> | <b>1.14E-02</b> | 1.32E-01        |
| rs16925517 |        | 9   | 109247001 | 1.90E-07 | <b>3.38E-05</b> | <b>4.55E-02</b> | <b>1.43E-02</b> |
| rs7974135  |        | 12  | 108371313 | 1.90E-07 | <b>1.31E-05</b> | <b>3.39E-02</b> | <b>4.55E-02</b> |
| rs7770848  |        | 6   | 44769237  | 2.09E-07 | <b>9.63E-07</b> | 1.57E-01        | 1.03E-01        |
| rs1530976  | SLC4A4 | 4   | 72393391  | 2.68E-07 | <b>7.74E-06</b> | <b>6.66E-03</b> | 5.64E-01        |
| rs35141484 | KLHL5  | 4   | 39088341  | 2.68E-07 | <b>4.59E-06</b> | 2.57E-01        | <b>1.43E-02</b> |
| rs928382   |        | 10  | 121881681 | 3.19E-07 | <b>2.21E-05</b> | 1.03E-01        | <b>1.43E-02</b> |
| rs4695314  |        | 4   | 47932661  | 3.56E-07 | <b>7.74E-06</b> | <b>4.95E-02</b> | <b>1.96E-02</b> |
| rs17033506 |        | 3   | 35639826  | 4.46E-07 | <b>9.63E-07</b> | 4.14E-01        | 8.33E-02        |
| rs17111521 |        | 14  | 41633385  | 4.84E-07 | <b>2.70E-03</b> | <b>4.18E-04</b> | <b>2.54E-02</b> |
| rs7045156  |        | 9   | 81926265  | 5.73E-07 | <b>3.74E-05</b> | <b>2.50E-03</b> | 3.17E-01        |

|            |                 |    |           |          |                 |                 |                 |
|------------|-----------------|----|-----------|----------|-----------------|-----------------|-----------------|
| rs6721181  |                 | 2  | 40115696  | 6.05E-07 | <b>1.24E-06</b> | <b>2.54E-02</b> | 7.06E-01        |
| rs1314595  | <i>ATRNL1</i>   | 10 | 116908479 | 6.91E-07 | <b>3.12E-04</b> | <b>1.16E-02</b> | <b>8.15E-03</b> |
| rs11021111 |                 | 11 | 95003263  | 7.98E-07 | <b>5.56E-04</b> | <b>1.16E-02</b> | <b>1.26E-02</b> |
| rs2928442  |                 | 10 | 59146466  | 8.68E-07 | <b>1.39E-04</b> | 1.17E-01        | <b>1.62E-03</b> |
| rs3814399  | <i>BOC</i>      | 3  | 112991492 | 8.95E-07 | <b>3.38E-05</b> | 1.57E-01        | <b>2.54E-02</b> |
| rs9590225  | <i>ABCC4</i>    | 13 | 95916201  | 8.95E-07 | <b>2.21E-05</b> | 5.88E-02        | 8.33E-02        |
| rs16882243 | <i>SEMA5A</i>   | 5  | 9226440   | 9.49E-07 | <b>1.08E-04</b> | <b>2.09E-02</b> | <b>3.39E-02</b> |
| rs9297216  |                 | 8  | 34045261  | 1.01E-06 | <b>3.82E-06</b> | <b>3.96E-02</b> | 8.35E-01        |
| rs7613331  |                 | 3  | 1533549   | 1.14E-06 | <b>1.95E-05</b> | 5.88E-02        | 1.57E-01        |
| rs35216186 |                 | 3  | 83038704  | 1.24E-06 | <b>1.60E-05</b> | 1.57E-01        | 8.33E-02        |
| rs9883878  |                 | 3  | 177855632 | 1.29E-06 | <b>2.73E-06</b> | <b>2.91E-02</b> | 1.00E+00        |
| rs41479544 | <i>ATP8B1</i>   | 18 | 55472316  | 1.29E-06 | <b>1.35E-05</b> | 5.64E-01        | <b>2.54E-02</b> |
| rs2218416  |                 | 18 | 65360863  | 1.38E-06 | <b>1.04E-04</b> | <b>6.71E-03</b> | 2.48E-01        |
| rs7561701  |                 | 2  | 138472227 | 1.48E-06 | <b>2.01E-05</b> | 1.08E-01        | <b>1.43E-02</b> |
| rs17129414 | <i>PDZRN4</i>   | 12 | 41893994  | 1.57E-06 | <b>9.58E-06</b> | 1.03E-01        | 3.17E-01        |
| rs943806   | <i>FAM102B</i>  | 1  | 109156284 | 1.62E-06 | <b>3.12E-04</b> | <b>8.15E-03</b> | 8.33E-02        |
| rs2705520  | <i>ATG3</i>     | 3  | 112269287 | 1.87E-06 | <b>8.95E-07</b> | 5.64E-01        | 1.03E-01        |
| rs11141597 |                 | 9  | 89527458  | 2.03E-06 | <b>1.53E-06</b> | 8.33E-02        | 1.00E+00        |
| rs2451167  |                 | 8  | 119152919 | 2.07E-06 | <b>1.08E-04</b> | 8.33E-02        | <b>2.09E-02</b> |
| rs2472669  | <i>NR1I2</i>    | 3  | 119501960 | 2.17E-06 | <b>1.47E-05</b> | 5.94E-02        | 2.57E-01        |
| rs2473967  |                 | 6  | 113479335 | 2.31E-06 | <b>1.82E-03</b> | <b>1.57E-04</b> | 3.17E-01        |
| rs674467   |                 | 11 | 104812647 | 2.38E-06 | <b>3.89E-03</b> | <b>1.02E-03</b> | <b>4.55E-02</b> |
| rs6733115  |                 | 2  | 217488954 | 2.43E-06 | <b>7.74E-06</b> | 1.03E-01        | <b>2.54E-02</b> |
| rs2272266  | <i>PLA1A</i>    | 3  | 119337198 | 2.43E-06 | <b>1.23E-04</b> | 6.55E-01        | <b>1.57E-03</b> |
| rs1418489  | <i>CAMTA1</i>   | 1  | 7425064   | 2.52E-06 | <b>6.33E-05</b> | 5.88E-02        | 8.33E-02        |
| rs17083580 | <i>KIAA0825</i> | 5  | 93648131  | 2.52E-06 | <b>1.31E-05</b> | 3.17E-01        | 8.33E-02        |
| rs2159424  |                 | 5  | 126487366 | 2.52E-06 | <b>1.08E-04</b> | <b>1.96E-02</b> | 1.57E-01        |
| rs1295378  |                 | 6  | 119685952 | 2.52E-06 | <b>2.21E-05</b> | 5.64E-01        | <b>2.54E-02</b> |
| rs17152730 |                 | 10 | 126911566 | 2.52E-06 | <b>1.31E-05</b> | 3.17E-01        | 1.03E-01        |
| rs12168899 |                 | 22 | 50101815  | 2.60E-06 | <b>6.33E-05</b> | <b>3.25E-02</b> | 8.33E-02        |
| rs1415649  |                 | 9  | 104636695 | 2.69E-06 | <b>1.48E-05</b> | 4.14E-01        | 9.56E-02        |
| rs6600391  | <i>HIVEP3</i>   | 1  | 42371447  | 2.73E-06 | <b>3.12E-04</b> | <b>4.55E-02</b> | <b>2.54E-02</b> |
| rs7006993  |                 | 8  | 83889759  | 3.06E-06 | <b>7.44E-05</b> | 5.78E-02        | 8.33E-02        |
| rs12359404 | <i>SORCS1</i>   | 10 | 108334189 | 3.10E-06 | <b>4.07E-04</b> | <b>5.32E-04</b> | 3.17E-01        |
| rs2807510  | <i>RIMS1</i>    | 6  | 73090537  | 3.42E-06 | <b>1.95E-05</b> | 1.80E-01        | 1.80E-01        |
| rs11007764 |                 | 10 | 30116104  | 3.44E-06 | <b>3.47E-04</b> | <b>4.55E-02</b> | <b>2.54E-02</b> |
| rs10400286 | <i>KCNQ1</i>    | 11 | 2616053   | 3.44E-06 | <b>1.31E-05</b> | 1.57E-01        | 1.57E-01        |
| rs17010574 | <i>GALNT14</i>  | 2  | 31243964  | 3.67E-06 | <b>2.67E-05</b> | 3.66E-01        | <b>1.43E-02</b> |
| rs6882632  |                 | 5  | 159017398 | 3.67E-06 | <b>1.19E-05</b> | 1.34E-01        | 8.33E-02        |
| rs872101   |                 | 3  | 67298578  | 3.71E-06 | <b>6.33E-05</b> | <b>2.36E-02</b> | <b>2.54E-02</b> |
| rs10005234 |                 | 4  | 68319533  | 3.82E-06 | <b>3.61E-05</b> | 5.94E-02        | 1.57E-01        |
| rs7807274  | <i>MKLN1</i>    | 7  | 131021099 | 3.82E-06 | <b>2.52E-06</b> | 6.06E-02        | 1.00E+00        |
| rs9918659  |                 | 7  | 54039000  | 3.82E-06 | <b>3.38E-05</b> | <b>3.90E-02</b> | 1.32E-01        |

|            |                |    |           |          |                 |                 |                 |
|------------|----------------|----|-----------|----------|-----------------|-----------------|-----------------|
| rs2303409  | <i>PGM2</i>    | 4  | 37846939  | 4.23E-06 | <b>6.33E-05</b> | 3.17E-01        | <b>3.39E-02</b> |
| rs16944951 |                | 16 | 51820998  | 4.23E-06 | <b>1.57E-03</b> | <b>1.14E-02</b> | <b>2.54E-02</b> |
| rs2031662  |                | 13 | 41610561  | 4.30E-06 | <b>1.19E-05</b> | 2.57E-01        | 1.57E-01        |
| rs7908624  |                | 10 | 132509961 | 4.47E-06 | <b>5.31E-05</b> | 2.85E-01        | <b>3.25E-02</b> |
| rs16976458 |                | 17 | 69196263  | 4.59E-06 | <b>2.21E-05</b> | 3.17E-01        | 1.57E-01        |
| rs17716091 |                | 17 | 65680034  | 5.00E-06 | <b>3.61E-05</b> | 1.80E-01        | 1.57E-01        |
| rs16922480 | <i>KANK1</i>   | 9  | 678010    | 5.02E-06 | <b>2.01E-05</b> | 7.06E-01        | <b>1.43E-02</b> |
| rs17036023 | <i>IGSF3</i>   | 1  | 117129711 | 5.20E-06 | <b>2.04E-07</b> | 6.95E-01        | <b>1.43E-02</b> |
| rs2155668  |                | 18 | 13799456  | 5.58E-06 | <b>1.39E-04</b> | 3.17E-01        | <b>8.15E-03</b> |
| rs1439706  |                | 2  | 35764414  | 5.75E-06 | <b>2.01E-05</b> | 1.00E+00        | <b>4.55E-02</b> |
| rs733187   |                | 2  | 175602377 | 5.75E-06 | <b>5.32E-04</b> | <b>2.09E-02</b> | <b>4.55E-02</b> |
| rs16888111 | <i>WDR27</i>   | 6  | 169935826 | 5.75E-06 | <b>5.70E-05</b> | <b>2.54E-02</b> | 5.64E-01        |
| rs9925521  | <i>CDH13</i>   | 16 | 83457455  | 5.75E-06 | <b>2.01E-05</b> | 5.64E-01        | 8.33E-02        |
| rs7552300  | <i>NFIA</i>    | 1  | 61688282  | 5.82E-06 | <b>1.95E-05</b> | 1.66E-01        | 1.32E-01        |
| rs1327013  |                | 10 | 130573275 | 5.90E-06 | <b>3.80E-04</b> | <b>7.53E-03</b> | 1.03E-01        |
| rs12070405 |                | 1  | 43357369  | 5.93E-06 | <b>1.31E-05</b> | 2.85E-01        | <b>3.39E-02</b> |
| rs1036966  |                | 8  | 126789900 | 5.93E-06 | <b>1.34E-03</b> | <b>1.05E-02</b> | <b>2.54E-02</b> |
| rs16990878 | <i>EFCAB6</i>  | 22 | 44042348  | 5.93E-06 | <b>7.89E-04</b> | <b>7.29E-03</b> | 1.03E-01        |
| rs10128616 | <i>GRM5</i>    | 11 | 88286437  | 6.03E-06 | <b>2.75E-04</b> | <b>1.58E-02</b> | <b>4.55E-02</b> |
| rs13374752 | <i>TMEM61</i>  | 1  | 55453391  | 6.11E-06 | <b>3.74E-05</b> | 8.81E-02        | <b>2.54E-02</b> |
| rs7716850  |                | 5  | 87430517  | 6.11E-06 | <b>2.56E-04</b> | 9.56E-02        | <b>3.39E-02</b> |
| rs4692508  |                | 4  | 31354090  | 6.36E-06 | <b>1.88E-05</b> | 1.49E-01        | 5.78E-01        |
| rs1935521  | <i>KCNQ5</i>   | 6  | 73573771  | 7.10E-06 | <b>3.89E-03</b> | <b>2.70E-03</b> | 8.33E-02        |
| rs3849488  | <i>ROBO2</i>   | 3  | 76464685  | 7.74E-06 | <b>1.83E-04</b> | 8.33E-02        | 8.33E-02        |
| rs9836097  |                | 3  | 74591012  | 7.74E-06 | <b>2.34E-04</b> | <b>4.55E-02</b> | <b>2.54E-02</b> |
| rs12280132 | <i>HRASLS5</i> | 11 | 63231259  | 7.74E-06 | <b>3.12E-04</b> | <b>1.43E-02</b> | 3.17E-01        |
| rs7157695  | <i>WDR25</i>   | 14 | 100896800 | 7.74E-06 | <b>3.12E-04</b> | 1.57E-01        | <b>2.54E-02</b> |
| rs17837682 |                | 7  | 156352856 | 8.24E-06 | <b>5.31E-05</b> | 8.33E-02        | 3.17E-01        |
| rs41334648 |                | 13 | 23200009  | 8.24E-06 | <b>1.69E-05</b> | 1.00E+00        | 7.07E-02        |
| rs11877823 |                | 18 | 57662696  | 8.42E-06 | <b>1.01E-04</b> | 2.39E-01        | <b>6.66E-03</b> |
| rs10219720 |                | 12 | 79109021  | 9.10E-06 | <b>1.57E-03</b> | <b>1.18E-03</b> | 3.17E-01        |
| rs12607175 | <i>DLGAP1</i>  | 18 | 4147483   | 9.10E-06 | <b>1.08E-04</b> | <b>8.15E-03</b> | 3.17E-01        |
| rs7527074  | <i>XPR1</i>    | 1  | 180645441 | 9.49E-06 | <b>2.73E-06</b> | 8.81E-02        | 6.55E-01        |
| rs7835585  | <i>TSRE1</i>   | 8  | 143298768 | 9.49E-06 | <b>5.32E-04</b> | <b>8.15E-03</b> | 9.56E-02        |
| rs10059123 |                | 5  | 154442093 | 9.55E-06 | <b>1.83E-04</b> | <b>3.90E-02</b> | 5.88E-02        |
| rs10120589 |                | 9  | 7391855   | 9.55E-06 | <b>2.01E-05</b> | 2.48E-01        | 1.03E-01        |
| rs1981993  | <i>CD82</i>    | 11 | 44607471  | 9.55E-06 | <b>1.60E-03</b> | <b>4.55E-02</b> | <b>8.15E-03</b> |
| rs11940540 |                | 4  | 36066470  | 9.58E-06 | <b>6.36E-04</b> | <b>1.43E-02</b> | 9.56E-02        |

**Table S5: Number of SNPs with p-value below cutoffs.**

| p-value cutoff             |       |       |       |       | Overlap |       |       |           |
|----------------------------|-------|-------|-------|-------|---------|-------|-------|-----------|
|                            | EA    | AA    | HA    | Mega  | EA&AA   | EA&HA | AA&HA | EA, AA&HA |
| <b>0.05</b>                | 58857 | 39658 | 39618 | 51638 | 2722    | 3270  | 1962  | 180       |
| <b>0.01</b>                | 15493 | 6538  | 6557  | 13250 | 97      | 132   | 48    | 2         |
| <b>1 x 10<sup>-4</sup></b> | 632   | 25    | 37    | 462   | 0       | 0     | 0     | 0         |
| <b>1 x 10<sup>-5</sup></b> | 126   | 1     | 5     | 106   | 0       | 0     | 0     | 0         |
| <b>1 x 10<sup>-6</sup></b> | 22    | 0     | 1     | 26    | 0       | 0     | 0     | 0         |

EA= European American, AA= African American, HA= Hispanic American populations, Mega: Mega-analysis based on combined samples from all three populations.

**Table S6: top 1% SNPs of RYR2 after imputation for each population.**

| P-value                   |           |          |         |       |                      |                                      |
|---------------------------|-----------|----------|---------|-------|----------------------|--------------------------------------|
| rsID                      | BP        | EA       | AA      | HA    | Region               | Possible Functional Effects          |
| <b>European Americans</b> |           |          |         |       |                      |                                      |
| <b>rs16835325</b>         | 237659306 | 2.55E-07 | 0.162   | 0.763 | intronic             | protein coding                       |
| <b>rs2797436</b>          | 237863718 | 0.000789 | 0.0105  | 0.317 | Synonymous coding    | protein coding                       |
| rs12136903                | 237966877 | 0.000789 | 0.157   | 1     | downstream, intronic | processed transcript, protein coding |
| <b>rs3820216</b>          | 237777828 | 0.000911 | 1       | 0.414 | Synonymous coding    | Protein coding                       |
| rs2253083                 | 237929556 | 0.00365  | 0.491   | 0.655 | intronic             | protein coding                       |
| <b>rs1953076</b>          | 237826332 | 0.00468  | 0.223   | 0.317 | intronic             | protein coding                       |
| NA                        | 237929787 | 0.00491  | 0.491   | 0.655 |                      |                                      |
| rs12737847                | 237945870 | 0.00596  | 0.0164  | 0.655 | intronic             | protein coding                       |
| NA                        | 237946481 | 0.00596  | 0.00729 | 0.655 |                      |                                      |
| NA                        | 237929790 | 0.00658  | 0.0896  | 0.317 |                      |                                      |
| rs113408406               | 237934206 | 0.00666  | NA      | 0.317 | intronic             | protein coding                       |
| rs10925507                | 237913281 | 0.0071   | 0.394   | 1     | intronic             | protein coding                       |
| rs12755289                | 237942500 | 0.00763  | 0.0719  | 0.655 | intronic             | protein coding                       |
| NA                        | 237773235 | 0.00804  | NA      | 0.763 |                      |                                      |
| rs80013027                | 237941945 | 0.0103   | 0.0833  | 1     | intronic             | protein coding                       |
| <b>rs2248295</b>          | 237729774 | 0.0126   | 1       | 0.593 | intronic             | protein coding                       |
| <b>rs6682119</b>          | 237618227 | 0.0143   | 0.0956  | 0.564 | intronic             | protein coding                       |
| rs140318912               | 237830680 | 0.0143   | NA      | NA    | intronic             | protein coding                       |
| rs114813259               | 238015916 | 0.0143   | NA      | NA    | intronic             | protein coding                       |
| rs145687313               | 237939429 | 0.0164   | 0.317   | 1     | intronic             | protein coding                       |
| rs79387075                | 237939590 | 0.0164   | 1       | 1     | intronic             | protein coding                       |
| rs143222085               | 237940597 | 0.0164   | 0.317   | 1     | intronic             | protein coding                       |
| rs148063848               | 237940611 | 0.0164   | 0.317   | 1     | intronic             | protein coding                       |
| rs143686364               | 237940973 | 0.0164   | 0.317   | 1     | intronic             | protein coding                       |
| rs147193397               | 237941144 | 0.0164   | 0.317   | 1     | intronic             | protein coding                       |

| <b>African Americans</b>  |           |          |          |         |                                  |                |
|---------------------------|-----------|----------|----------|---------|----------------------------------|----------------|
| rs2685301                 | 237890437 | NA       | 0.000415 | 0.317   | synonymous coding,<br>3prime utr | protein coding |
| <b>rs2797447</b>          | 237905342 | 0.0254   | 0.00109  | 1       | intronic                         | protein coding |
| rs2819766                 | 237917047 | 0.317    | 0.00109  | 0.103   | intronic                         | protein coding |
| rs2685289                 | 237909539 | 0.317    | 0.0017   | 0.48    | intronic                         | protein coding |
| <b>rs2797441</b>          | 237881770 | NA       | 0.0025   | 1       | 3prime utr,<br>synonymous coding | protein coding |
| <b>rs6429032</b>          | 237805925 | 0.936    | 0.00389  | 0.405   | intronic                         | protein coding |
| rs2177065                 | 237915007 | 0.0278   | 0.00406  | 1       | intronic                         | protein coding |
| rs3766877                 | 237808779 | 0.744    | 0.00443  | 0.763   | intronic                         | protein coding |
| rs1879673                 | 237895805 | NA       | 0.00607  | 0.317   | intronic                         | protein coding |
| rs141708048               | 237815112 | NA       | 0.00666  | 0.317   | intronic                         | protein coding |
| rs2819769                 | 237911369 | NA       | 0.00706  | 0.564   | intronic                         | protein coding |
| NA                        | 237946481 | 0.00596  | 0.00729  | 0.655   |                                  |                |
| rs6669057                 | 237638942 | 1        | 0.00793  | 0.527   | intronic                         | protein coding |
| NA                        | 237741600 | 0.286    | 0.00793  | 0.0412  |                                  |                |
| rs11583033                | 237809064 | 0.744    | 0.00815  | 1       | intronic                         | protein coding |
| rs1987939                 | 237751942 | 0.96     | 0.00944  | 0.384   | intronic                         | protein coding |
| <b>rs2685296</b>          | 237898423 | NA       | 0.00944  | 0.655   | intronic                         | protein coding |
| <b>rs2797436</b>          | 237863718 | 0.000789 | 0.0105   | 0.317   | synonymous coding                | protein coding |
| rs939699                  | 237865203 | NA       | 0.0105   | 1       | intronic                         | protein coding |
| <b>rs2779431</b>          | 237755348 | 0.157    | 0.0124   | 0.317   | intronic                         | protein coding |
| rs12136895                | 237757370 | 0.954    | 0.0133   | 0.0105  | intronic                         | protein coding |
| rs10925429                | 237637687 | 1        | 0.0136   | 0.527   | intronic                         | protein coding |
| rs10925430                | 237637880 | 1        | 0.0136   | 0.527   | intronic                         | protein coding |
| rs10925431                | 237637930 | 1        | 0.0136   | 0.527   | intronic                         | protein coding |
| rs10754607                | 237638053 | 1        | 0.0136   | 0.527   | intronic                         | protein coding |
| rs10754608                | 237638182 | 1        | 0.0136   | 0.527   | intronic                         | protein coding |
| NA                        | 237639225 | 0.919    | 0.0136   | 0.527   |                                  |                |
| rs6429019                 | 237639394 | 0.798    | 0.0136   | 0.527   | intronic                         | protein coding |
| rs6663913                 | 237639870 | 0.798    | 0.0136   | 0.527   | intronic                         | protein coding |
| <b>Hispanic Americans</b> |           |          |          |         |                                  |                |
| <b>rs34729156</b>         | 237735016 | 0.738    | 0.842    | 0.00118 | intronic                         | protein coding |
| rs2779395                 | 237726963 | 0.323    | 0.18     | 0.0016  | intronic                         | protein coding |
| NA                        | 237727031 | 0.408    | 0.18     | 0.0016  |                                  |                |
| rs2392628                 | 237745795 | 0.957    | 0.139    | 0.003   | intronic                         | protein coding |
| rs4415553                 | 237745782 | 0.914    | 0.317    | 0.00319 | intronic                         | protein coding |
| rs2805475                 | 237726500 | 0.439    | 0.16     | 0.00349 | intronic                         | protein coding |
| rs2805477                 | 237726909 | 0.408    | 0.18     | 0.00349 | intronic                         | protein coding |
| rs2779396                 | 237727085 | 0.409    | 0.14     | 0.00349 | intronic                         | protein coding |
| rs722581                  | 237725727 | 0.781    | 0.835    | 0.0035  | intronic                         | protein coding |
| rs7540869                 | 237598400 | 0.317    | 0.547    | 0.00389 | intronic                         | protein coding |

|                  |           |       |       |         |          |                |
|------------------|-----------|-------|-------|---------|----------|----------------|
| NA               | 237598877 | 0.317 | 0.547 | 0.00389 |          |                |
| rs2805388        | 237727057 | 0.408 | 0.14  | 0.00389 | intronic | protein coding |
| rs61832624       | 237737107 | 0.78  | 0.842 | 0.00443 | intronic | protein coding |
| rs6689392        | 237737862 | 0.824 | 0.842 | 0.00443 | intronic | protein coding |
| rs61832625       | 237741696 | 0.781 | 0.847 | 0.00443 | intronic | protein coding |
| rs2127157        | 237747986 | 0.734 | 0.405 | 0.00443 | intronic | protein coding |
| rs61832626       | 237748340 | 0.822 | 0.405 | 0.00443 | intronic | protein coding |
| NA               | 237758424 | 0.908 | 0.593 | 0.00443 |          |                |
| rs2127159        | 237762445 | 0.77  | 0.593 | 0.00443 |          |                |
| <b>rs2779397</b> | 237727112 | 0.445 | 0.14  | 0.00468 |          |                |
| rs2779393        | 237725353 | 0.345 | 0.128 | 0.00535 |          |                |
| rs2618716        | 237676668 | 0.692 | 0.706 | 0.00607 |          |                |
| rs61832596       | 237723742 | 0.766 | 0.45  | 0.00649 |          |                |

Bolded SNPs were genotyped in our study data, others were imputed.

**Table S7: Top 30 pathways of each population when top 1,000 SNPs are declared as noteworthy.**

The order of the pathways corresponds to their significant level. Pathways in bold are shared by two of the populations. There is no pathway shared by all the three populations.

| <i>European American</i> (p-values: 0.0008 – 0.0762)                      | <i>P-value</i> |
|---------------------------------------------------------------------------|----------------|
| BIOCARTA G2 PATHWAY                                                       | 0.0008         |
| REACTOME E2F TRANSCRIPTIONAL TARGETS AT G1 S                              | 0.0034         |
| REACTOME E2F MEDIATED REGULATION OF DNA REPLICATION                       | 0.0036         |
| BIOCARTA PTC1 PATHWAY                                                     | 0.0138         |
| SA G2 AND M PHASES                                                        | 0.0168         |
| REACTOME G2 M CHECKPOINTS                                                 | 0.0178         |
| REACTOME E2F ENABLED INHIBITION OF PRE REPLICATION COMPLEX FORMATION      | 0.0198         |
| <b>BIOCARTA STATHMIN PATHWAY</b>                                          | <b>0.0204</b>  |
| BIOCARTA ATM PATHWAY                                                      | 0.0268         |
| REACTOME CYCLIN A1 ASSOCIATED EVENTS DURING G2 M TRANSITION               | 0.032          |
| REACTOME CELL CELL ADHESION SYSTEMS                                       | 0.0376         |
| REACTOME REMOVAL OF THE FLAP INTERMEDIATE                                 | 0.038          |
| BIOCARTA G1 PATHWAY                                                       | 0.044          |
| REACTOME CREB PHOSPHORYLATION THROUGH THE ACTIVATION OF CAMKII            | 0.0448         |
| REACTOME RNA POLYMERASE III TRANSCRIPTION INITIATION FROM TYPE 2 PROMOTER | 0.0482         |
| KEGG CELL CYCLE                                                           | 0.0484         |
| BIOCARTA P35ALZHEIMERS PATHWAY                                            | 0.0494         |
| REACTOME ACTIVATION OF ATR IN RESPONSE TO REPLICATION STRESS              | 0.0506         |
| BIOCARTA PITX2 PATHWAY                                                    | 0.0552         |
| BIOCARTA EIF2 PATHWAY                                                     | 0.0554         |
| BIOCARTA PTDINS PATHWAY                                                   | 0.0584         |

|                                                                      |               |
|----------------------------------------------------------------------|---------------|
| KEGG NON HOMOLOGOUS END JOINING                                      | 0.0594        |
| REACTOME LAGGING STRAND SYNTHESIS                                    | 0.0628        |
| KEGG N GLYCAN BIOSYNTHESIS                                           | 0.063         |
| REACTOME RETROGRADE NEUROTROPHIN SIGNALLING                          | 0.0636        |
| BIOCARTA CACAM PATHWAY                                               | 0.0682        |
| REACTOME RNA POLYMERASE III TRANSCRIPTION                            | 0.0714        |
| REACTOME AMINE COMPOUND SLC TRANSPORTERS                             | 0.0718        |
| BIOCARTA SRCRPTP PATHWAY                                             | 0.0742        |
| REACTOME RAS ACTIVATION UOPN CA2 INFUX THROUGH NMDA RECEPTOR         | 0.0762        |
| <hr/>                                                                |               |
| <b><i>African American</i></b> (p-values: 0.0032 – 0.0866)           |               |
| KEGG ALANINE ASPARTATE AND GLUTAMATE METABOLISM                      | 0.0032        |
| BIOCARTA LONGEVITY PATHWAY                                           | 0.0088        |
| KEGG MELANOMA                                                        | 0.0162        |
| REACTOME EFFECTS OF PIP2 HYDROLYSIS                                  | 0.0204        |
| REACTOME SIGNALING BY BMP                                            | 0.0268        |
| BIOCARTA BAD PATHWAY                                                 | 0.0306        |
| KEGG REGULATION OF ACTIN CYTOSKELETON                                | 0.0344        |
| BIOCARTA P53 PATHWAY                                                 | 0.0408        |
| REACTOME MYOGENESIS                                                  | 0.0484        |
| KEGG DILATED CARDIOMYOPATHY                                          | 0.0522        |
| <b>REACTOME PREFOLDIN MEDIATED TRANSFER OF SUBSTRATE TO CCT TRIC</b> | <b>0.0532</b> |
| REACTOME ELECTRON TRANSPORT CHAIN                                    | 0.0536        |
| REACTOME CHAPERONIN MEDIATED PROTEIN FOLDING                         | 0.0558        |
| KEGG PROSTATE CANCER                                                 | 0.0566        |
| BIOCARTA CTLA4 PATHWAY                                               | 0.0586        |
| KEGG TGF BETA SIGNALING PATHWAY                                      | 0.062         |
| KEGG HYPERTROPHIC CARDIOMYOPATHY HCM                                 | 0.0632        |
| KEGG RENIN ANGIOTENSIN SYSTEM                                        | 0.0654        |
| REACTOME SHCMEDIATED CASCADE                                         | 0.0662        |
| KEGG GLYCOSAMINOGLYCAN BIOSYNTHESIS KERATAN SULFATE                  | 0.067         |
| BIOCARTA HDAC PATHWAY                                                | 0.069         |
| KEGG PANCREATIC CANCER                                               | 0.0718        |
| REACTOME PI3K CASCADE                                                | 0.0718        |
| BIOCARTA RACCYCD PATHWAY                                             | 0.0764        |
| BIOCARTA AKT PATHWAY                                                 | 0.0768        |
| KEGG COLORECTAL CANCER                                               | 0.078         |
| <b>REACTOME CLASS C3 METABOTROPIC GLUTAMATE PHEROMONE RECEPTORS</b>  | <b>0.083</b>  |
| REACTOME PHOSPHOLIPASE CMEDIATED CASCADE                             | 0.0838        |
| KEGG SYSTEMIC LUPUS ERYTHEMATOSUS                                    | 0.086         |
| REACTOME METABOLISM OF LIPIDS AND LIPOPROTEINS                       | 0.0866        |



| <b>Hispanic American</b> (p-values: 0.0006 – 0.0958)                 |               |
|----------------------------------------------------------------------|---------------|
| REACTOME AMINE LIGAND BINDING RECEPTORS                              | 0.0006        |
| REACTOME G ALPHA S SIGNALLING EVENTS                                 | 0.006         |
| REACTOME GLUCONEOGENESIS                                             | 0.0138        |
| KEGG CITRATE CYCLE TCA CYCLE                                         | 0.016         |
| KEGG SPHINGOLIPID METABOLISM                                         | 0.0166        |
| REACTOME GPCR LIGAND BINDING                                         | 0.022         |
| BIOCARTA CK1 PATHWAY                                                 | 0.0266        |
| REACTOME OPIOID SIGNALLING                                           | 0.0342        |
| BIOCARTA CFTR PATHWAY                                                | 0.0352        |
| BIOCARTA GATA3 PATHWAY                                               | 0.0364        |
| KEGG THYROID CANCER                                                  | 0.0376        |
| KEGG PRIMARY BILE ACID BIOSYNTHESIS                                  | 0.0464        |
| <b>REACTOME PREFOLDIN MEDIATED TRANSFER OF SUBSTRATE TO CCT TRIC</b> | <b>0.0474</b> |
| REACTOME METABOLISM OF PROTEINS                                      | 0.0504        |
| REACTOME STRIATED MUSCLE CONTRACTION                                 | 0.0618        |
| <b>REACTOME CLASS C3 METABOTROPIC GLUTAMATE PHEROMONE RECEPTORS</b>  | <b>0.062</b>  |
| REACTOME SYNTHESIS OF BILE ACIDS AND BILE SALTS                      | 0.0668        |
| REACTOME CITRIC ACID CYCLE                                           | 0.0678        |
| ST G ALPHA S PATHWAY                                                 | 0.069         |
| REACTOME CLASS A1 RHODOPSIN LIKE RECEPTORS                           | 0.0698        |
| KEGG ENDOCYTOSIS                                                     | 0.0708        |
| REACTOME ADP SIGNALLING THROUGH P2Y PURINOCEPTOR 12                  | 0.0722        |
| REACTOME DARPP32 EVENTS                                              | 0.0768        |
| REACTOME GLUCOSE METABOLISM                                          | 0.0796        |
| <b>BIOCARTA STATHMIN PATHWAY</b>                                     | <b>0.082</b>  |
| KEGG ARRHYTHMOGENIC RIGHT VENTRICULAR CARDIOMYOPATHY ARVC            | 0.0852        |
| REACTOME INHIBITION OF INSULIN SECRETION BY ADRENALINE NORADRENALINE | 0.0894        |
| KEGG PPAR SIGNALING PATHWAY                                          | 0.0906        |
| BIOCARTA CSK PATHWAY                                                 | 0.0906        |
| REACTOME STEROID METABOLISM                                          | 0.0958        |

**Table S8: Top 30 GO terms of each population when top 1K SNPs are declared as noteworthy.** The order of the GOs corresponds to their significant level. GOs in bold are shared by two of the populations. There is no pathway shared by all the three populations.

| <b>European American</b> (p-values: 0.0006 - 0.0670) | <b>p-value</b> |
|------------------------------------------------------|----------------|
| CELLULAR RESPONSE TO STRESS                          | 0.0006         |
| VITAMIN BINDING                                      | 0.0056         |
| JAK STAT CASCADE                                     | 0.0062         |

|                                                                       |               |
|-----------------------------------------------------------------------|---------------|
| VITAMIN TRANSPORT                                                     | 0.0072        |
| ER NUCLEAR SIGNALING PATHWAY                                          | 0.0078        |
| REGULATION OF GENE SPECIFIC TRANSCRIPTION                             | 0.0078        |
| CELLULAR RESPONSE TO STIMULUS                                         | 0.0110        |
| S PHASE OF MITOTIC CELL CYCLE                                         | 0.0150        |
| TRANSCRIPTION COREPRESSOR ACTIVITY                                    | 0.0198        |
| CALCIUM INDEPENDENT CELL CELL ADHESION                                | 0.0204        |
| PHOSPHORIC DIESTER HYDROLASE ACTIVITY                                 | 0.0210        |
| LATE ENDOSOME                                                         | 0.0248        |
| S PHASE                                                               | 0.0314        |
| REGULATION OF CELL CYCLE                                              | 0.0342        |
| TRANSCRIPTION FACTOR BINDING                                          | 0.0342        |
| NEGATIVE REGULATION OF CELLULAR COMPONENT ORGANIZATION AND BIOGENESIS | 0.0354        |
| CONDENSED CHROMOSOME                                                  | 0.0414        |
| 3 5 CYCLIC NUCLEOTIDE PHOSPHODIESTERASE ACTIVITY                      | 0.0432        |
| CYCLIC NUCLEOTIDE PHOSPHODIESTERASE ACTIVITY                          | 0.0438        |
| TRANSCRIPTION REPRESSOR ACTIVITY                                      | 0.0464        |
| MITOCHONDRIAL MEMBRANE                                                | 0.0508        |
| MITOCHONDRIAL MEMBRANE PART                                           | 0.0510        |
| MEMBRANE LIPID BIOSYNTHETIC PROCESS                                   | 0.0550        |
| RESPONSE TO DNA DAMAGE STIMULUS                                       | 0.0556        |
| REGULATION OF HEART CONTRACTION                                       | 0.0564        |
| <b>RIBONUCLEASE ACTIVITY</b>                                          | <b>0.0576</b> |
| LIGASE ACTIVITY                                                       | 0.0634        |
| COFACTOR BINDING                                                      | 0.0638        |
| TRANSCRIPTION FACTOR COMPLEX                                          | 0.0642        |
| DNA DAMAGE RESPONSE SIGNAL TRANSDUCTION                               | 0.0670        |

---

***African American*** (p-values: 0.0006 - 0.0448)

|                                                             |        |
|-------------------------------------------------------------|--------|
| POSITIVE REGULATION OF CELL PROLIFERATION                   | 0.0006 |
| LYSOSOMAL TRANSPORT                                         | 0.0016 |
| CARBOHYDRATE BINDING                                        | 0.0038 |
| RNA CATABOLIC PROCESS                                       | 0.0050 |
| VACUOLAR TRANSPORT                                          | 0.0052 |
| SUGAR BINDING                                               | 0.0120 |
| PYRIMIDINE NUCLEOTIDE METABOLIC PROCESS                     | 0.0150 |
| SENSORY PERCEPTION OF CHEMICAL STIMULUS                     | 0.0172 |
| BIOPOLYMER CATABOLIC PROCESS                                | 0.0198 |
| UBIQUITIN LIGASE COMPLEX                                    | 0.0220 |
| RECEPTOR SIGNALING PROTEIN SERINE THREONINE KINASE ACTIVITY | 0.0226 |
| REGULATION OF CELL PROLIFERATION                            | 0.0232 |
| CELL PROLIFERATION GO 0008283                               | 0.0242 |
| POSITIVE REGULATION OF CELLULAR PROCESS                     | 0.0246 |

|                                                 |               |
|-------------------------------------------------|---------------|
| LYSOSOME ORGANIZATION AND BIOGENESIS            | 0.0286        |
| NUCLEAR UBIQUITIN LIGASE COMPLEX                | 0.0308        |
| VACUOLE ORGANIZATION AND BIOGENESIS             | 0.0312        |
| GLYCOSAMINOGLYCAN BINDING                       | 0.0318        |
| BILE ACID METABOLIC PROCESS                     | 0.0326        |
| IMMUNE EFFECTOR PROCESS                         | 0.0338        |
| STRUCTURAL MOLECULE ACTIVITY                    | 0.0358        |
| DETECTION OF CHEMICAL STIMULUS                  | 0.0374        |
| <b>MACROMOLECULE CATABOLIC PROCESS</b>          | <b>0.0374</b> |
| POSITIVE REGULATION OF BIOLOGICAL PROCESS       | 0.0376        |
| POLYSACCHARIDE BINDING                          | 0.0400        |
| <b>CELLULAR MACROMOLECULE CATABOLIC PROCESS</b> | <b>0.0404</b> |
| <b>RIBONUCLEASE ACTIVITY</b>                    | <b>0.0436</b> |
| GOLGI MEMBRANE                                  | 0.0444        |
| STRUCTURAL CONSTITUENT OF CYTOSKELETON          | 0.0444        |
| REGULATION OF MEMBRANE POTENTIAL                | 0.0448        |

---

***Hispanic American*** (p-values: 0.0004-0.0282)

---

|                                                     |               |
|-----------------------------------------------------|---------------|
| NEGATIVE REGULATION OF CATALYTIC ACTIVITY           | 0.0004        |
| PROTEIN KINASE BINDING                              | 0.0016        |
| KINASE BINDING                                      | 0.0040        |
| REGULATION OF TRANSLATION                           | 0.0050        |
| ANION TRANSMEMBRANE TRANSPORTER ACTIVITY            | 0.0080        |
| NEGATIVE REGULATION OF HYDROLASE ACTIVITY           | 0.0100        |
| NEGATIVE REGULATION OF TRANSFERASE ACTIVITY         | 0.0104        |
| REGULATION OF PROTEIN METABOLIC PROCESS             | 0.0110        |
| CATABOLIC PROCESS                                   | 0.0124        |
| CELLULAR BIOSYNTHETIC PROCESS                       | 0.0152        |
| ECTODERM DEVELOPMENT                                | 0.0156        |
| REGULATION OF GENE EXPRESSION                       | 0.0168        |
| TRANSLATION                                         | 0.0170        |
| <b>MACROMOLECULE CATABOLIC PROCESS</b>              | <b>0.0184</b> |
| APICAL PLASMA MEMBRANE                              | 0.0188        |
| BIOSYNTHETIC PROCESS                                | 0.0196        |
| PRODUCTION OF MOLECULAR MEDIATOR OF IMMUNE RESPONSE | 0.0198        |
| <b>CELLULAR MACROMOLECULE CATABOLIC PROCESS</b>     | <b>0.0204</b> |
| REGULATION OF CATABOLIC PROCESS                     | 0.0210        |
| REGULATION OF METABOLIC PROCESS                     | 0.0210        |
| MACROMOLECULE BIOSYNTHETIC PROCESS                  | 0.0224        |
| TISSUE DEVELOPMENT                                  | 0.0242        |
| REGULATION OF CELLULAR PROTEIN METABOLIC PROCESS    | 0.0246        |
| ENZYME BINDING                                      | 0.0246        |
| PROTEIN COMPLEX                                     | 0.0248        |
| TRANSLATION FACTOR ACTIVITY NUCLEIC ACID BINDING    | 0.0248        |

|                                           |        |
|-------------------------------------------|--------|
| APICAL PART OF CELL                       | 0.0266 |
| CYTOSKELETAL PART                         | 0.0268 |
| ACTIVE TRANSMEMBRANE TRANSPORTER ACTIVITY | 0.0276 |
| RESPONSE TO CARBOHYDRATE STIMULUS         | 0.0282 |

---
